# Supplementary material for: Analysis of the Molecular Networks in Androgen Dependent and Independent Prostate Cancer Revealed Fragile and Robust Subsystems
Source: PLOS journal article supplement (doi:10.1371/journal.pone.0008864), 2010-01-27
Supplement: S2 (10.1371/journal.pone.0008864.s002) [file journal.pone.0008864.s002]

**Table S2:** Experimental training data used to estimate the ensemble of prostate model parameters.

| Experimental Setup                                      | Observation                                                        | citation | use        |
|---------------------------------------------------------|--------------------------------------------------------------------|----------|------------|
| C-81 transfection with WT PAcP                          | cyclin D 0.7 of C-81 WT                                            | †        | training   |
| C-81 transfection with cPacP                            | cyclin D 0.3 of C-81 WT                                            | †        | training   |
| C-81 transfection with sPacP                            | cyclin D 1.1 fold of WT C-81                                       | †        | training   |
| Addition of 10nm DHT to C-81                            | PSA increased over time                                            | (14)     | training   |
| Addition of 10nM DHT to C-33                            | PSA & Her2 activation increased and PAcP decreased                 | (14)     | training   |
| Overexpression of Her2 in C-33                          | PSA mRNA 2.2 fold of C-33 WT                                       | (18)     | training   |
| Overexpression of Her2 in C-33                          | PSA 2 fold of C-33 WT                                              | (14)     | training   |
| Transfection of constitutively active MEK in C-33       | PSA 3 fold of C-33 WT                                              | (14)     | training   |
| 1 $\mu$ M MEK inhibitor PD98059 in C-81                 | PSA 0.6 of C-81 WT                                                 | (14)     | training   |
| MEK inhibitor PD98059 in C-33 with Her2 over-expression | PSA 1.86 of C-33 WT (compared to 2 with Her2 overexpression alone) | (14)     | training   |
| 0.5 $\mu$ M Her2 inhibitor AG879 in C-81                | PSA 0.58 of C-81 WT                                                | (14)     | training   |
| 10 $\mu$ M Her2 inhibitor AG879 in C-81                 | PSA 0.17 of C-81 WT                                                | (14)     | training   |
| EGFR inhibitor AG1478 in C-81                           | no PSA effect                                                      | (14)     | training   |
| 50ng/ml EGF to HeLa cell culture                        | transient increase in Erk activity                                 | (30)     | training   |
| 0.1nM DHT added to AD LNCaP                             | increased cyclin D expression                                      | (57)     | validation |
| 2nM milbolerone added to AD LNCaP                       | Increased PSA secretion                                            | (58)     | validation |
| 2nM milbolerone added to AD LNCaP with anti-sense AR    | Increased PSA secretion to lower extent then WT                    | (58)     | validation |
